# Supplementary material for: Gene regulatory networks on transfer entropy (GRNTE): a novel approach to reconstruct gene regulatory interactions applied to a case study for the plant pathogen Phytophthora infestans
Source: Theor Biol Med Model. 2019 Apr 9;16:7. doi: 10.1186/s12976-019-0103-7 (PMC6454757; doi:10.1186/s12976-019-0103-7)
Supplement: Supplementary file 3 — Table S2. Mean expression values for 48 TFs from P. infestans during the interaction with S. tuberosum group Phureja Col3 and Col2. Relative expression is calculated comparing RT-PCR measurements to time 0 h.p.i. for both Col2 and Col3. Expression profiles are also compared between the two hosts to observe differences during the interaction specific of cultivar. (XLSX 26 kb) [file 12976_2019_103_MOESM3_ESM.xlsx]

## Sheet: MeanCol2
Mean
T	PITG00038	PITG00513	PITG00514	PITG00982	PITG00988	PITG01056	PITG01528	PITG01850	PITG02143	PITG02520	PITG03670	PITG04464	PITG05317	PITG05595	PITG05989	PITG05990	PITG06748	PITG07109	PITG08410	PITG08697	PITG08755	PITG08960	PITG10310	PITG10311	PITG10768	PITG11223	PITG11562	PITG11647	PITG11710	PITG11731	PITG12749	PITG13032	PITG13133	PITG14364	PITG14400	PITG14401	PITG14420	PITG16114	PITG17552	PITG17559	PITG17567	PITG19153	PITG19361	PITG19362	PITG19607	PITG19851	PITG20209	PITG21561
0	1.02837	1.09913	1.08801	1.04698	1.01785	1.0565	1.08633	1.03362	1.0022	1.03352	1.04497	1.00159	1.00022	1.30133	1.09542	1.04036	1.00462	1.01235	1.07624	1.00197	1.06953	1.03191	1.0001	1.07536	1.12472	1.09173	1.0398	1.04125	1.06219	1.00303	1.09407	1.0015	1.04742	1.02317	1.06007	1.02271	1.06749	1.09766	1.032	1.02744	1.09428	1.05937	1.00007	1.06325	1.01048	1.01461	1.05054	1.07881
12	0.328604	1.24785	2.02603	0.387614	2.34419	0.624483	1.04986	0.848173	0.245305	0.858261	1.14943	0.0331529	0.00370445	0.201281	1.29601	1.71328	0.161346	1.56428	2.01172	0.0297208	0.557019	0.0228695	0.0743506	0.126887	0.250338	1.17702	1.86269	1.43117	0.313708	0.225113	0.908904	0.344587	1.03736	2.19439	0.486485	0.766015	0.0930222	1.6861	1.9256	0.84317	1.6724	1.48566	0.40565	0.102595	1.59255	0.497248	1.56864	0.778716
24	0.571788	1.22815	2.42387	0.352051	2.03458	1.21288	0.994976	0.826868	0.292377	0.836776	1.26051	0.0439394	0.243531	0.292662	1.19294	1.18441	0.254069	1.57301	1.87336	0.0751646	0.366794	0.0772157	0.122525	0.0722645	0.708596	1.22877	1.67599	1.72286	0.677861	0.209667	0.956617	0.440934	1.29325	2.4943	0.515581	0.715907	0.100983	1.88545	1.83378	0.704901	1.57736	1.6465	0.642871	0.0914487	1.64776	0.39637	1.24172	0.491795
36	0.557225	0.929741	1.98048	0.432394	1.85661	0.843618	0.734025	0.583514	0.220336	0.761859	1.50053	0.137295	0.61052	0.147338	0.877604	1.29342	0.26301	1.62409	1.77439	0.0793887	0.936049	0.102126	0.108861	0.105835	0.893017	1.7471	2.76783	1.62987	0.285941	0.246093	0.900367	0.564099	1.12354	2.17303	0.576092	0.816133	0.0905466	1.5718	1.92676	0.631677	1.26878	1.63636	0.858835	0.335467	1.34485	0.757113	1.35026	0.504509
48	0.59412	1.40967	2.13978	0.666562	1.70776	0.924486	0.79782	0.78024	0.0157054	0.549541	1.35628	0.0598473	0.225073	0.161532	1.40049	1.32851	0.0952288	1.91073	1.90482	0.085242	0.45093	0.0553822	0.00423689	0.0929963	0.789862	1.49206	1.9178	1.20476	0.135492	0.0138756	0.743091	0.0772292	0.777469	2.07443	0.897148	0.487871	0.201953	1.41805	2.46318	1.29312	1.99746	1.64359	0.0956517	0.298484	1.64357	0.929151	1.82717	1.00296
60	0.439127	1.82448	2.15625	0.468072	2.43476	0.56815	1.16464	1.05379	0.00720075	0.976821	0.886809	0.00493475	0.00816598	0.305819	1.47138	1.35825	0.00599735	1.91937	2.10813	0.00419211	0.799803	0.0299369	8.0354e-05	0.0779817	0.253585	1.75681	2.07184	0.768243	0.119542	0.00100635	1.05258	0.00155333	1.03665	2.09789	0.555501	0.307605	0.130178	1.48243	2.34238	1.49102	1.84665	1.65891	0.00179459	0.29361	1.64256	1.09629	1.99757	1.32456
72	0.236906	2.56691	2.3246	0.331239	2.11549	0.575186	1.58522	1.18459	0.00278376	1.30915	0.499767	0.00449003	0.000210374	0.216655	1.74185	2.41463	0.00528517	2.20665	2.29628	0.00192272	0.820519	0.0666995	0.000639478	0.0906335	0.1128	1.74928	1.81176	0.526248	0.0934491	0.00020242	0.722467	0.00262558	1.51993	1.98278	0.602453	0.290444	0.103567	1.97363	2.37723	1.53799	1.89357	1.4815	0.000567332	0.430609	1.47753	1.71452	2.14349	1.24896

## Sheet: MeanCol3
Mean
T	PITG00038	PITG00513	PITG00514	PITG00982	PITG00988	PITG01056	PITG01528	PITG01850	PITG02143	PITG02520	PITG03670	PITG04464	PITG05317	PITG05595	PITG05989	PITG05990	PITG06748	PITG07109	PITG08410	PITG08697	PITG08755	PITG08960	PITG10310	PITG10311	PITG10768	PITG11223	PITG11562	PITG11647	PITG11710	PITG11731	PITG12749	PITG13032	PITG13133	PITG14364	PITG14400	PITG14401	PITG14420	PITG16114	PITG17552	PITG17559	PITG17567	PITG19153	PITG19361	PITG19362	PITG19607	PITG19851	PITG20209	PITG21561
0	1.03197	1.08481	1.09876	1.03683	1.02441	1.05726	1.05513	1.03604	1.0057	1.03215	1.04413	1.0008	1.00037	1.02983	1.03625	1.0732	1.00347	1.02042	1.08282	1.00338	1.0968	1.02728	1.00052	1.01144	1.1236	1.00782	1.03963	1.04622	1.06072	1.00243	1.09566	1.00068	1.03002	1.02381	1.05549	1.04455	1.06727	1.06552	1.05036	1.01062	1.06019	1.08113	1.00074	1.07087	1.09314	1.0137	1.05666	1.08019
12	0.391199	1.08164	2.00812	0.36671	2.61691	0.860378	0.688359	0.920275	0.271406	0.825524	1.14492	0.016779	0.0378245	0.22702	1.13761	1.53534	0.275695	1.87756	2.46964	0.0509311	0.517993	0.0701773	0.100164	0.0807778	0.58083	1.29301	1.95163	1.31903	0.587389	0.192952	1.17729	0.381778	0.989222	2.30811	0.489325	0.720733	0.0786128	2.05861	1.95433	1.01184	1.35778	1.51064	0.551565	0.14893	1.66674	0.465899	1.88382	0.704167
24	0.575631	1.19903	1.74736	0.441327	2.19807	1.09472	0.746053	0.707437	0.118315	0.515725	1.55952	0.111169	0.773982	0.233788	1.10313	1.45327	0.298881	1.44207	1.95006	0.094039	0.433631	0.0705223	0.101089	0.0584706	0.837761	1.21044	1.70242	2.16149	0.467266	0.162828	0.868883	0.453549	1.26068	2.10584	0.453943	0.709727	0.0947612	1.31053	2.07222	0.727688	1.71276	1.80407	0.531934	0.106201	1.56889	0.731297	1.52151	0.533568
36	0.910356	0.993533	2.05093	0.470215	2.24309	1.1337	0.743208	0.869315	0.258481	0.542372	1.44738	0.0757695	0.588999	0.304507	1.06884	1.68926	0.263284	2.03999	2.02571	0.0709991	0.656869	0.0567502	0.118768	0.0660788	0.667416	0.941656	1.74466	2.02964	0.442785	0.260762	0.912052	0.407225	1.34316	2.48287	0.492655	0.988996	0.099386	1.72483	2.42808	0.971018	1.9789	1.70994	0.496309	0.368424	1.68941	0.725676	1.30651	0.699649
48	0.540192	1.89035	2.03586	0.706499	1.71503	0.80179	0.697434	0.946299	0.00303775	0.339053	1.31067	0.0268542	0.0305476	0.160232	1.53005	1.53537	0.0350357	2.14085	2.32578	0.033597	0.526694	0.0399551	0.000109271	0.102139	0.751372	1.61362	2.12558	0.979868	0.0838633	0.00346073	0.747058	0.0204971	0.84982	2.3301	0.986783	0.263306	0.164734	1.31105	2.08137	1.35235	1.70415	1.63318	0.00396696	0.365983	1.9203	1.38092	2.46908	1.12154
60	0.459576	1.79479	2.42505	0.547034	1.63569	0.498284	1.10813	1.02673	0.000723333	0.96781	0.524846	0.00561048	0.00106111	0.261258	1.56023	2.11588	0.00351977	1.82534	2.14006	0.00287272	0.618573	0.050505	8.38751e-05	0.0803776	0.157181	1.89269	2.25667	0.457543	0.074858	0.00093245	0.683033	0.00176001	1.37796	2.36592	0.563007	0.261677	0.178429	2.00806	2.14492	1.69316	2.0048	1.19357	0.000870982	0.235047	1.90635	1.6523	2.26001	1.25313
72	0.389274	2.43323	2.07838	0.370978	2.17665	0.520943	1.20438	1.2852	0.000693018	1.57337	0.552141	0.00240459	0.000955192	0.21687	1.81087	1.73046	0.00334962	1.9811	2.72433	0.00243202	0.676958	0.037193	4.39173e-05	0.0833331	0.0889238	2.17798	2.16651	0.535427	0.103083	0.000750609	0.802871	0.00436516	1.44396	2.09505	0.589716	0.227523	0.111852	1.95479	2.49258	1.31724	2.06258	1.76905	0.000364899	0.397958	2.08745	1.16038	2.12672	0.947908
[truncated: 48 more columns]

## Sheet: Col2VSCol3
Mean
T	PITG00038	PITG00513	PITG00514	PITG00982	PITG00988	PITG01056	PITG01528	PITG01850	PITG02143	PITG02520	PITG03670	PITG04464	PITG05317	PITG05595	PITG05989	PITG05990	PITG06748	PITG07109	PITG08410	PITG08697	PITG08755	PITG08960	PITG10310	PITG10311	PITG10768	PITG11223	PITG11562	PITG11647	PITG11710	PITG11731	PITG12749	PITG13032	PITG13133	PITG14364	PITG14400	PITG14401	PITG14420	PITG16114	PITG17552	PITG17559	PITG17567	PITG19153	PITG19361	PITG19362	PITG19607	PITG19851	PITG20209	PITG21561
0	-0.172449	0.107636	-0.0802431	0.351121	-0.0428276	-0.0192053	0.264427	-0.025979	-1.37175	0.0148658	0.0271137	0.98535	-0.747715	0.014459	0.520333	-0.184751	0.409863	-0.0537563	-0.00456127	-0.776282	-0.477478	0.226207	-2.35011	-0.602252	0.0130124	0.0848204	0.00106488	-0.16434	0.0345325	0.317472	-0.024137	1.13536	0.181236	-0.0937375	0.114257	-0.971904	0.00478584	0.255955	-0.109852	0.204114	-0.421451	-0.184631	-0.128419	-0.164191	0.124023	0.0114969	-0.0348511	-0.0251438
12	-0.251551	0.206218	0.0128117	0.0799822	-0.158777	-0.462309	0.60896	-0.117705	-0.145877	0.0561055	0.00567065	0.982476	-3.35199	-0.173609	0.188071	0.1582	-0.772915	-0.263355	-0.295872	-0.777073	0.104795	-1.61758	-0.429945	0.651514	-1.21424	-0.135603	-0.0672941	0.117716	-0.904894	0.222408	-0.373266	-0.147863	0.0685439	-0.0728907	-0.00839658	0.087908	0.242809	-0.287979	-0.0213614	-0.263083	0.300674	-0.0240538	-0.443295	-0.537671	-0.0656914	0.0939468	-0.264145	0.145181
24	-0.00966411	0.0346129	0.472131	-0.326062	-0.111507	0.147869	0.415384	0.225055	1.30519	0.698239	-0.307091	-1.33917	-1.66819	0.324036	0.112919	-0.295128	-0.234349	0.125383	-0.0578848	-0.323206	-0.241498	0.130814	0.277453	0.305575	-0.241574	0.0216747	-0.0225785	-0.327217	0.536747	0.364753	0.138779	-0.0406959	0.0367989	0.244237	0.183688	0.0125083	0.0917365	0.524765	-0.176356	-0.0458993	-0.118812	-0.131854	0.273281	-0.215765	0.0707637	-0.883609	-0.293165	-0.117615
36	-0.708172	-0.0957381	-0.0504307	-0.120974	-0.272817	-0.426375	-0.0179361	-0.575112	-0.230352	0.490241	0.0520207	0.857592	0.0517751	-1.04735	-0.284409	-0.385208	-0.00150383	-0.328932	-0.1911	0.161132	0.510978	0.847661	-0.125657	0.679564	0.4201	0.891688	0.665809	-0.316473	-0.630891	-0.0835326	-0.0186034	0.47012	-0.257582	-0.192303	0.22572	-0.277161	-0.134382	-0.134038	-0.333637	-0.620312	-0.641257	-0.0634532	0.791143	-0.135198	-0.329075	0.0611826	0.0475221	-0.471751
48	0.137283	-0.423291	0.0718244	-0.0839476	-0.00613166	0.205428	0.194007	-0.278379	2.37018	0.696717	0.0493496	1.15614	2.88126	0.0116615	-0.127647	-0.208782	1.44257	-0.16406	-0.288056	1.34323	-0.224062	0.471041	5.27703	-0.135281	0.0720725	-0.112997	-0.148405	0.298087	0.6921	2.0034	-0.00768149	1.91373	-0.128373	-0.167677	-0.137387	0.88976	0.293886	0.113192	0.242987	-0.0646073	0.229111	0.00916237	4.59168	-0.29412	-0.224496	-0.571642	-0.434361	-0.161215
60	-0.0656661	0.023669	-0.169487	-0.224902	0.573879	0.189305	0.0717497	0.0375323	3.31542	0.0133709	0.756728	-0.185147	2.94405	0.2272	-0.0845901	-0.639508	0.768845	0.0724726	-0.021687	0.54526	0.370699	-0.754505	-0.0618722	-0.0436593	0.690042	-0.107481	-0.12328	0.747655	0.675289	0.110031	0.623908	-0.180223	-0.410615	-0.173465	-0.019363	0.233292	-0.45486	-0.437837	0.127057	-0.183417	-0.118548	0.474962	1.04294	0.320953	-0.214864	-0.59184	-0.178084	0.0799817
72	-0.716472	0.0771621	0.161528	-0.163464	-0.0411176	0.142902	0.396398	-0.11761	2.00607	-0.265229	-0.143782	0.900934	-2.18283	-0.00143667	-0.0560608	0.480652	0.657955	0.155558	-0.246602	-0.339007	0.27747	0.842647	3.86403	0.121154	0.343129	-0.31623	-0.257987	-0.024948	-0.141555	-1.89071	-0.152236	-0.733398	0.0739739	-0.0794644	0.0308279	0.352248	-0.111024	0.0138436	-0.0683572	0.22353	-0.123342	-0.255918	0.636695	0.113763	-0.498553	0.56321	0.0113317	0.397909
